# Supplementary material
Source: Springer Nature journal article supplement (https://www.springermedizin.de/resource/supplementary/13012_2010_306_MOESM3_ESM.pdf/9629682)

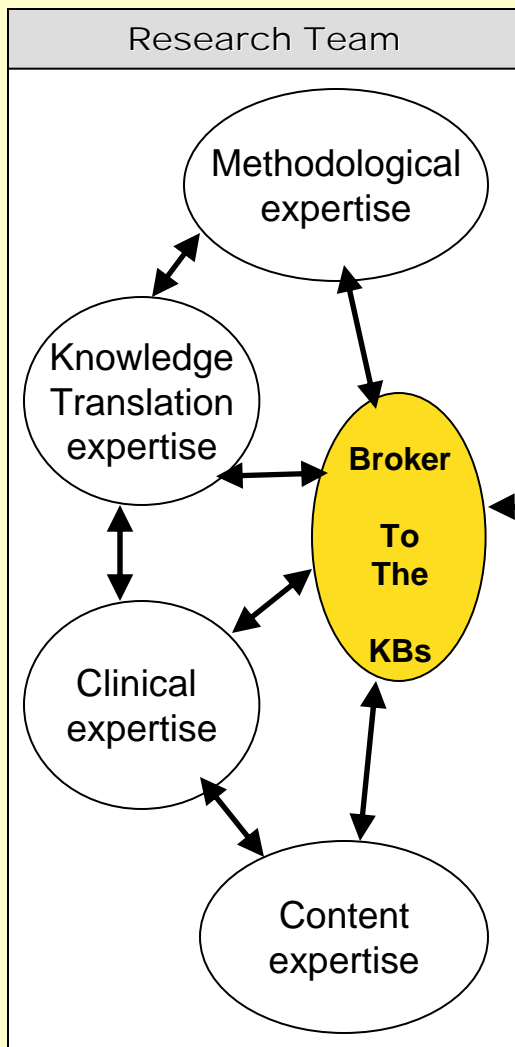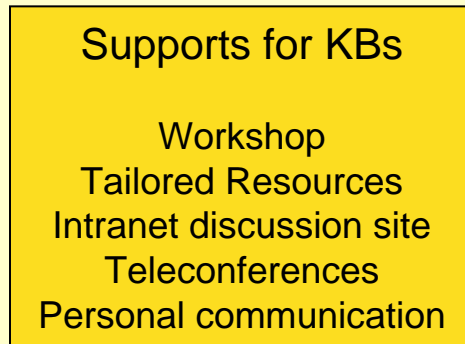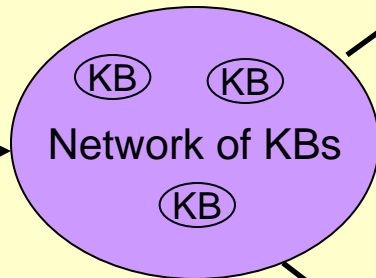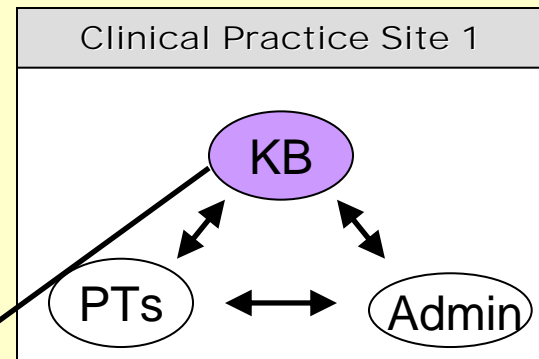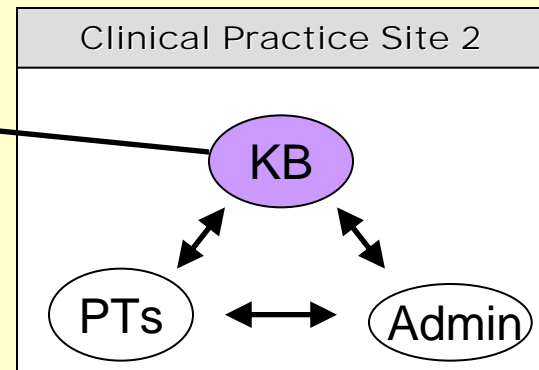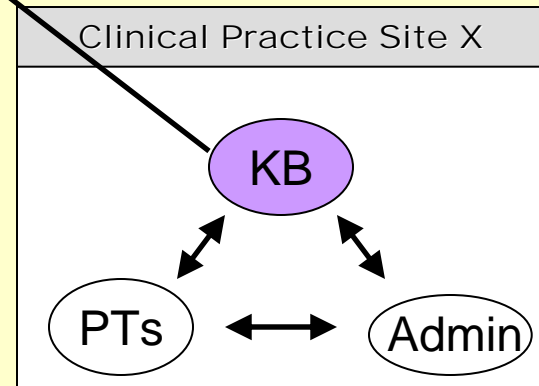

Supplement: MOESM3 [file 9629682]
